# Supplementary material for: Bayesian inversion of satellite altimetry for Arctic sea ice and snow thickness
Source: Copernicus journal article supplement (doi:10.5194/egusphere-2025-1163), 2025-04-28
Supplement: Supplementary file 1 [file egusphere-2025-1163-supplement.pdf]

# ***Supplement of : Bayesian inversion of Arctic sea ice and snow thickness from satellite altimetry***

Elie René-Bazin<sup>1,2</sup>, Michel Tsamados<sup>2</sup>, Sabrina Sofea Binti Aliff Raziuddin<sup>2</sup>, Joel Perez Ferrer<sup>2</sup>, Tudor Suci<sup>2</sup>, Carmen Nab<sup>2,3</sup>, Chamkaur Ghag<sup>4</sup>, Harry Heorton<sup>2</sup>, Rosemary Willatt<sup>2</sup>, Jack Landy<sup>5</sup>, Matthew Fox<sup>6</sup>, and Thomas Bodin<sup>7</sup>

<sup>1</sup>Département de Sciences de la Terre, Ecole Normale Supérieure de Lyon, Lyon, France

<sup>2</sup>Centre for Polar Observation and Modelling, Department of Earth Sciences, University College London, London, UK

<sup>3</sup>Ocean Forecasting Research & Development, Met Office, UK

<sup>4</sup>Department of Physics & Astronomy, University College London, London, UK

<sup>5</sup>Department of Physics and Technology, UiT The Arctic University of Norway, Tromsø, Norway

<sup>6</sup>Department of Earth Sciences, University College London, London, UK

<sup>7</sup>Institute of Marine Sciences (ICM-CSIC), Barcelona, Spain

**Correspondence:** René-Bazin Elie : [elie.rene-bazin@ens-lyon.fr](mailto:elie.rene-bazin@ens-lyon.fr)

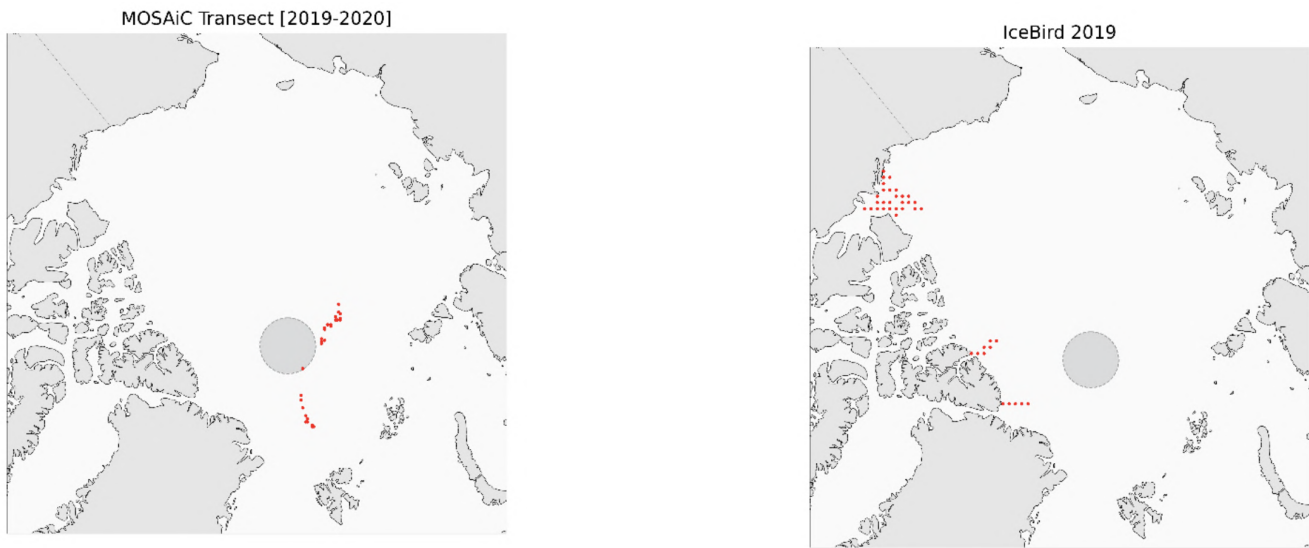

**Figure S1.** (left) MOSAiC tracks for Winter 2019-2020 (right) IceBird tracks for 2019/04

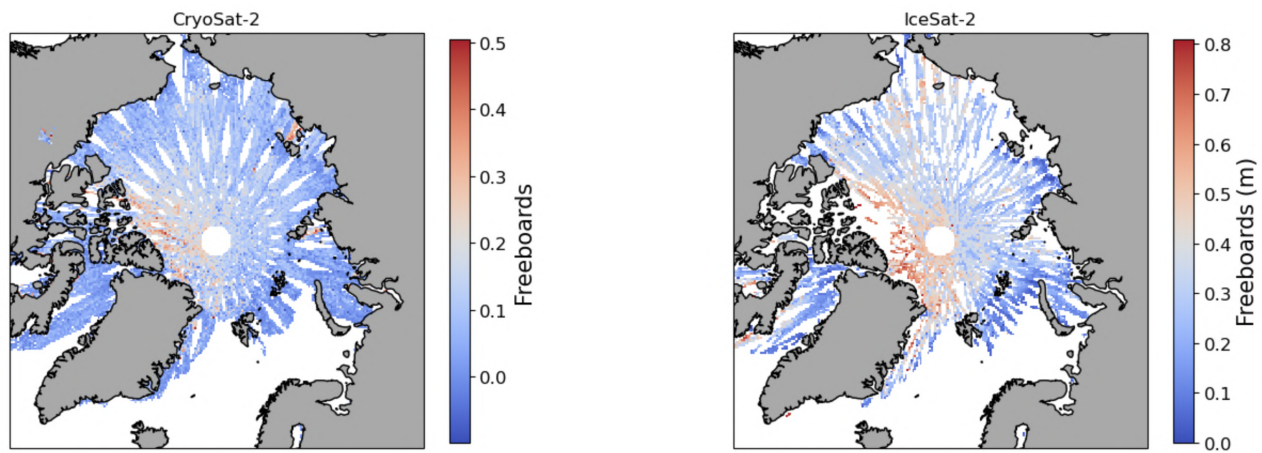

**Figure S2.** Example of input for April 2019 with the CS-IS satellite combination. The input is composed of daily along-track data binned on a 25 km<sup>2</sup> EASE2 grid of along track freeboards for each satellite.

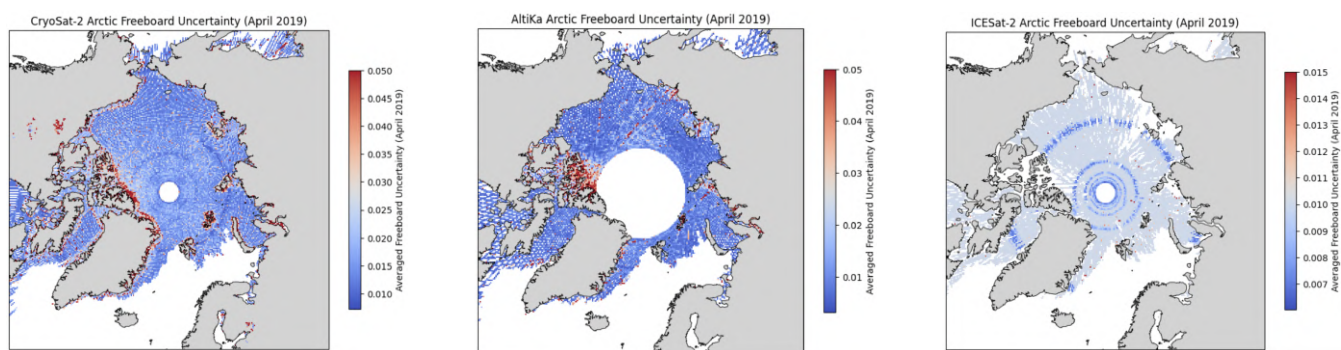

**Figure S3.** Input uncertainties used for 2019/04.

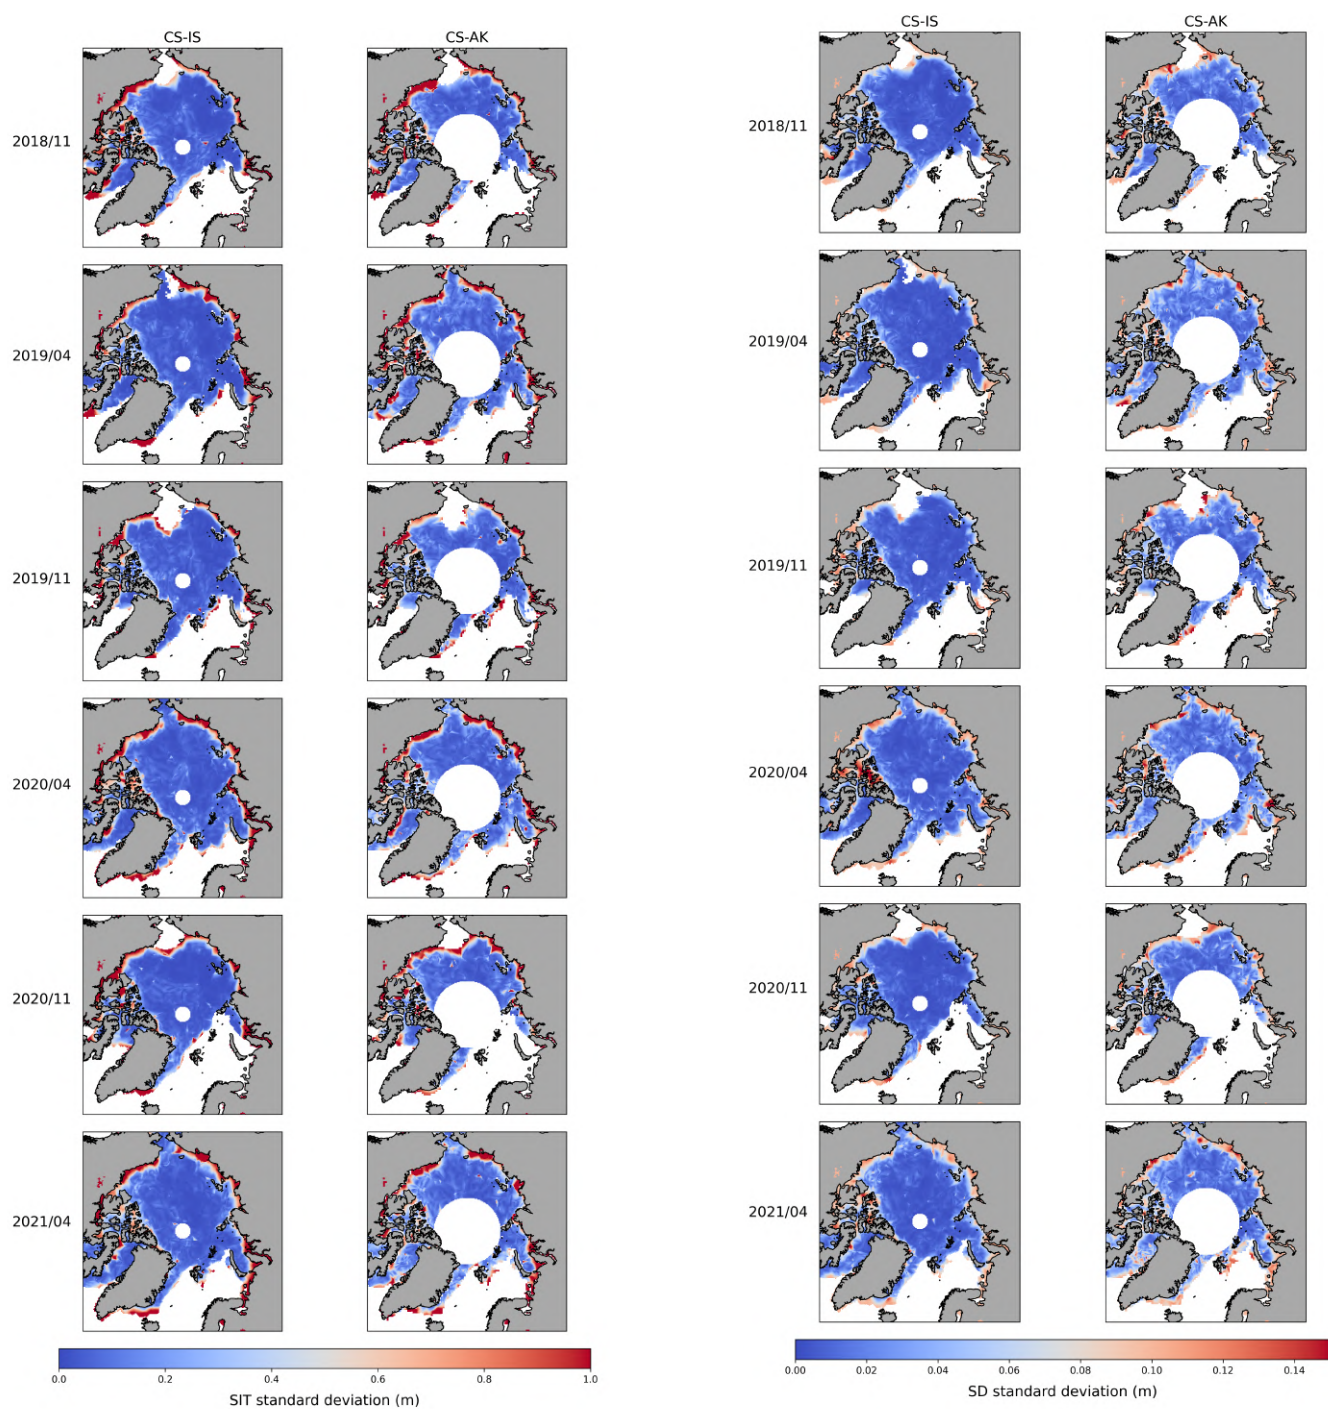

**Figure S4.** Standard deviations for (left) SIT and (right) SD, computed following the inversion for CS-IS-2p and CS-AK-2p.



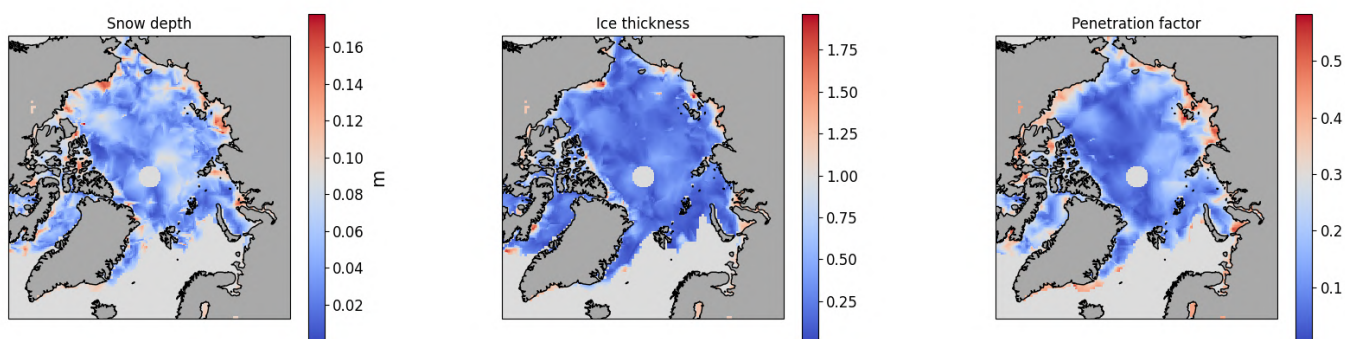

**Figure S5.** Standard deviations for the model CS-IS-3p for April 2019

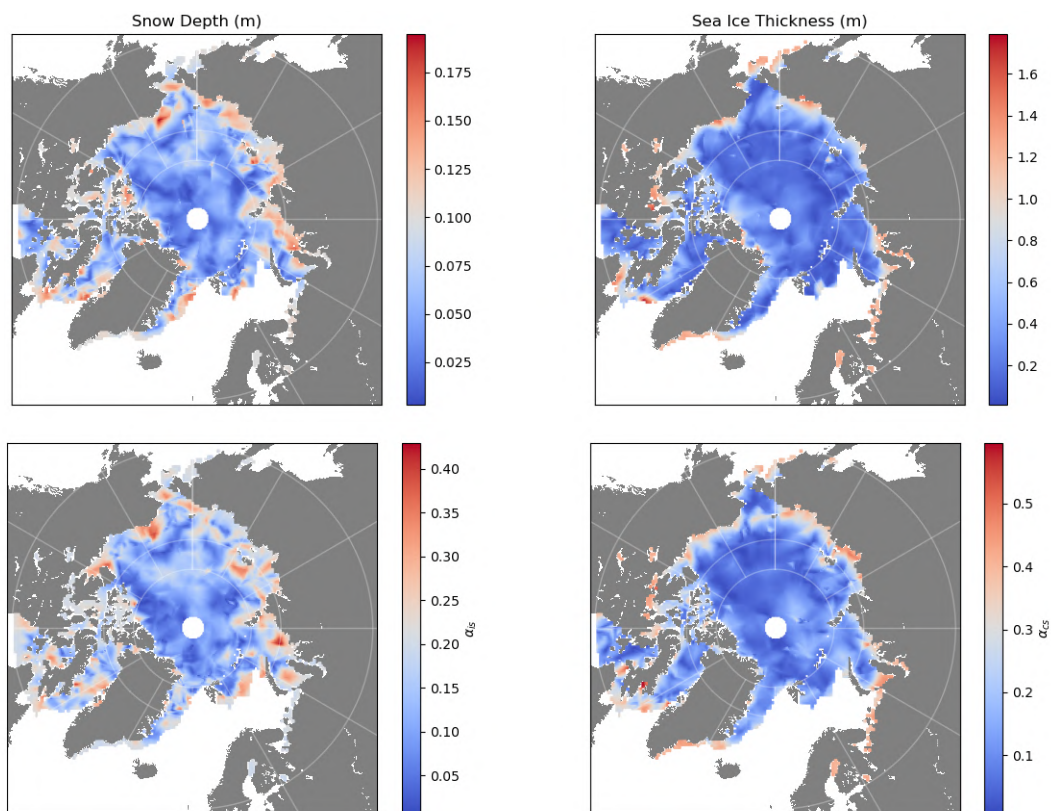

**Figure S6.** Standard deviations for the model CS-IS-4p for April 2019.

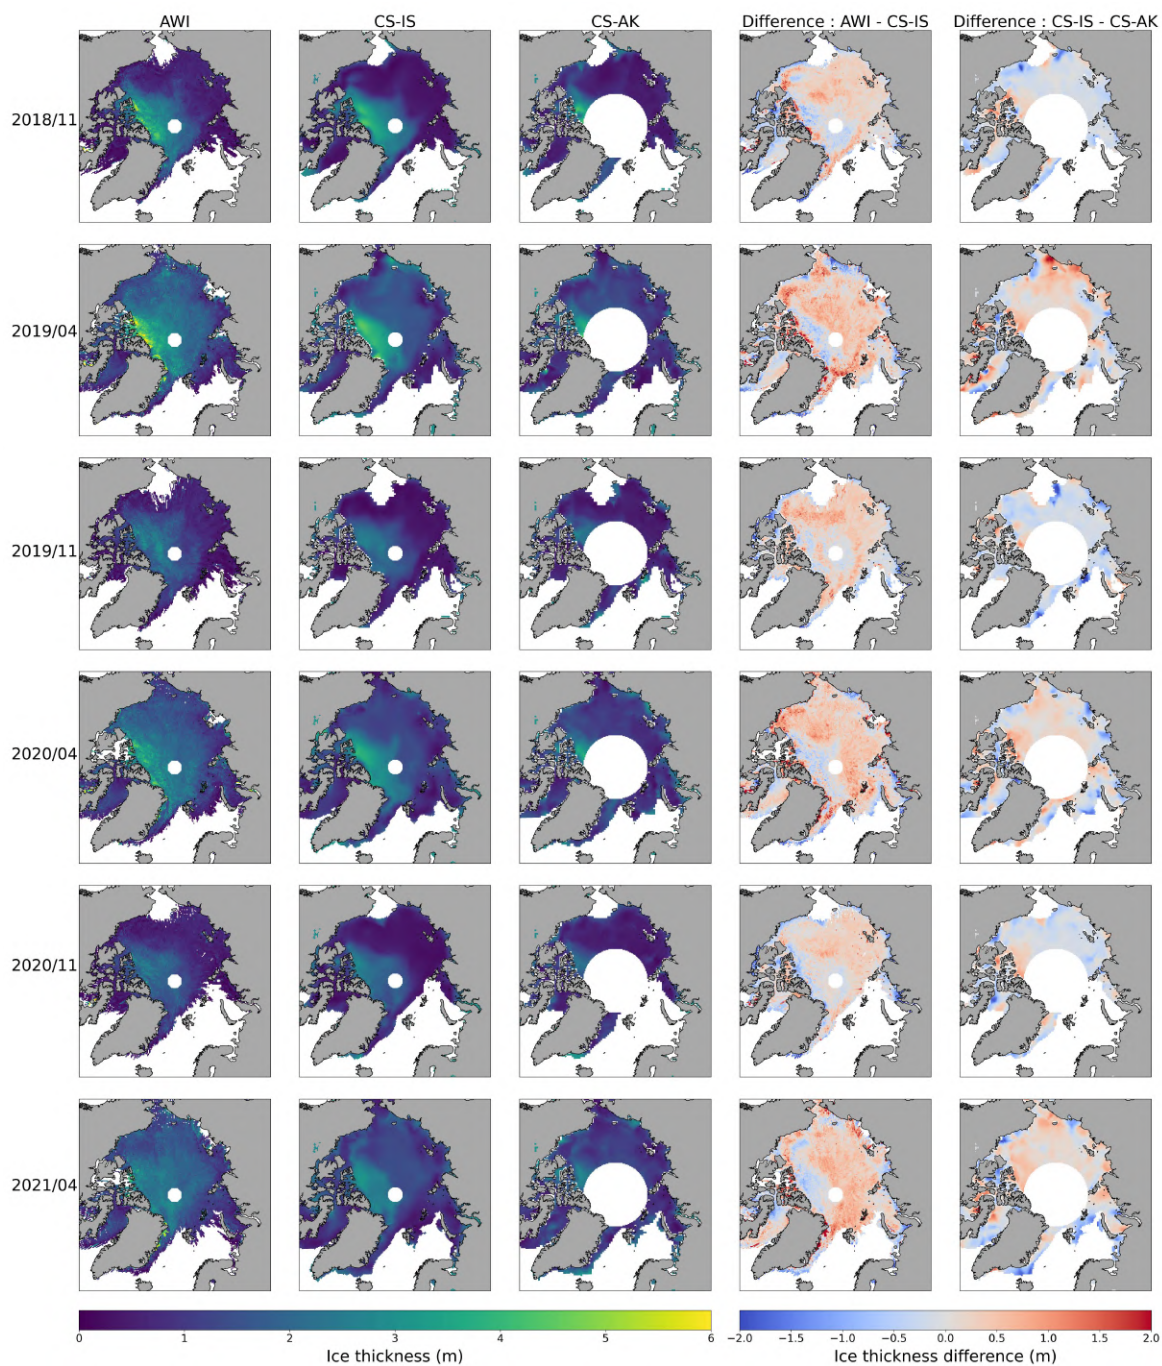

**Figure S7.** Same than Figure 1 (in the main paper) but with a constant 2 cm error for the input freeboards.

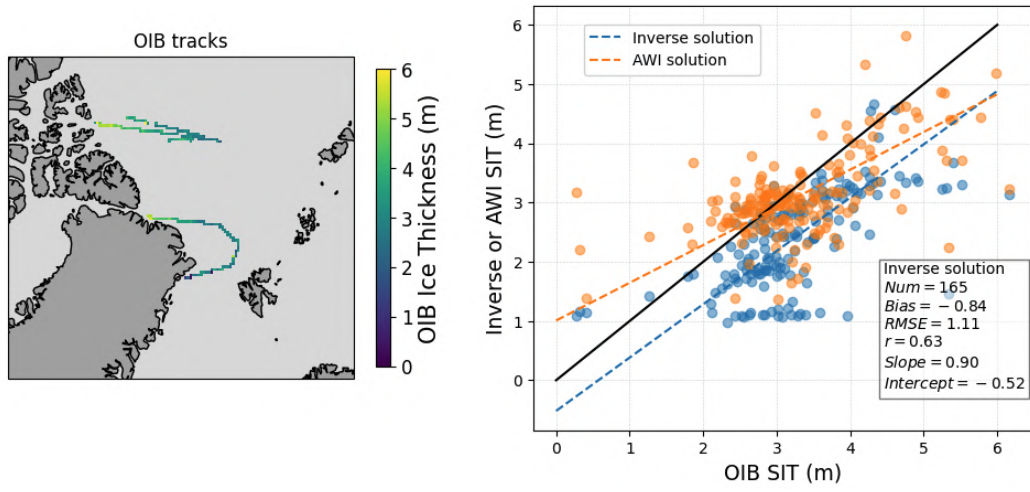

**Figure S8.** Comparison against OIB for SIT with CS-IS-2p-LARM and  $\alpha_{cs} = 0.75$ .

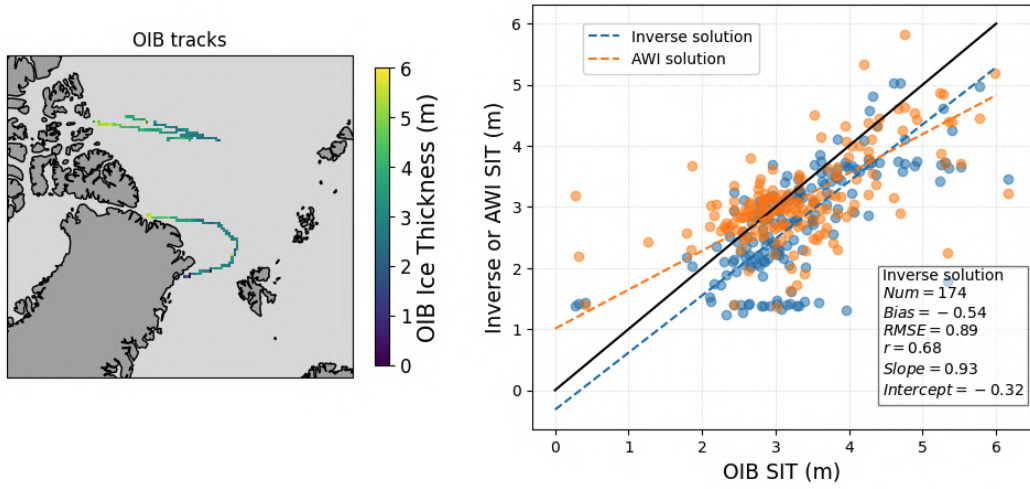

**Figure S9.** Comparison against OIB for SIT with CS-IS-2p-LARM and  $\alpha_{cs} = 0.85$ .



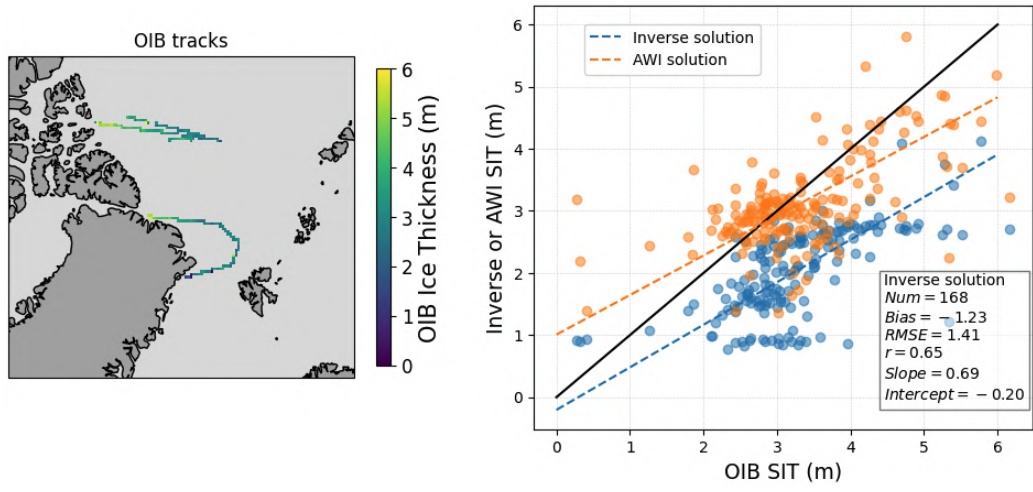

**Figure S10.** Comparison against OIB for SIT with CS-IS-2p-LARM and  $\alpha_{cs} = 0.65$ .

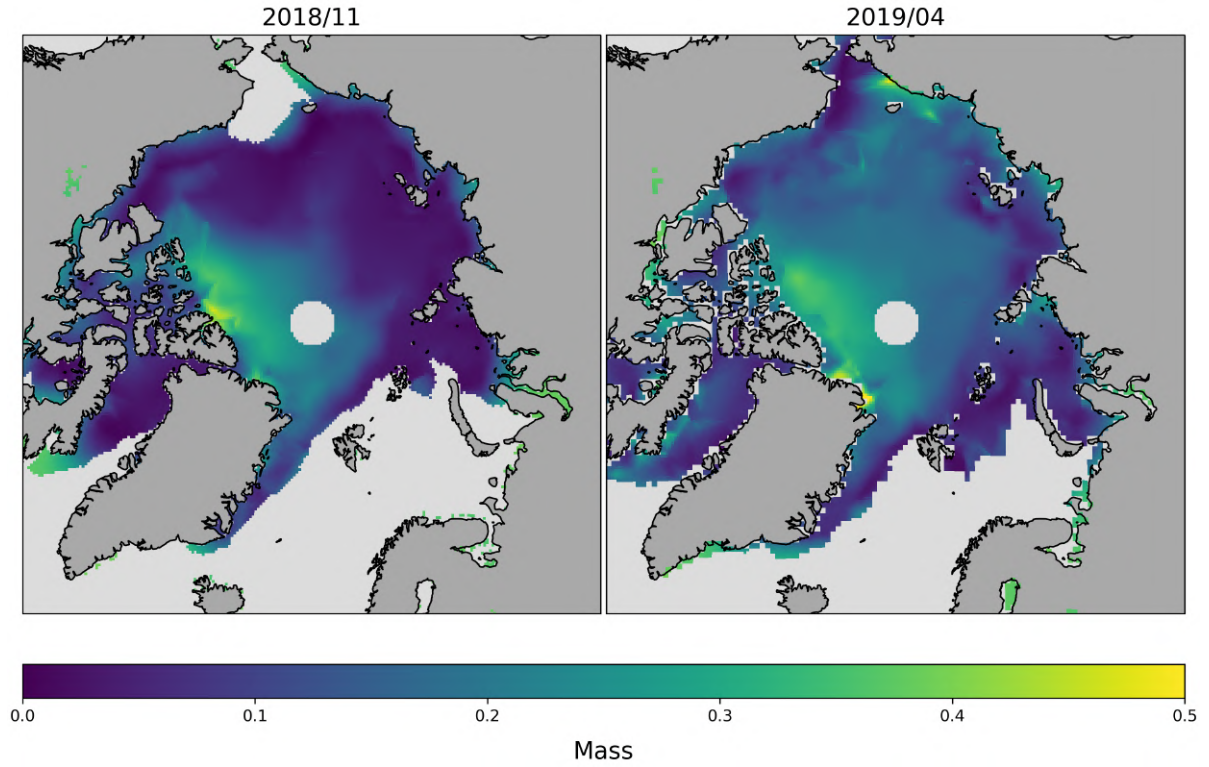

**Figure S11.** Inversion solution when inverting for the mass  $\frac{\rho_w - \rho_i}{\rho_w} H_i$  for November 2018 and April 2019.
